# Supplementary material for: Neighborhood Socioeconomic Deprivation and Health Care Utilization of Medically Complex Children
Source: Oxford University Press journal article supplement (doi:10.1542/peds.2021-052592), 2022-03-07
Supplement: peds_2021052592supplementarydata.pdf [file peds_2021052592supplementarydata.pdf]

## Supplemental Information

**SUPPLEMENTAL TABLE 2** Area-Level Socioeconomic Deprivation Index and Included Census Tract-Level Socioeconomic Characteristics

| Census Tract-Level Characteristics | Overall Cohort, <i>n</i> = 512 | High Deprivation (0.42–0.82), <i>n</i> = 131 | High-Medium Deprivation (0.32–0.42), <i>n</i> = 120 | Low-Medium Deprivation (0.26–0.32), <i>n</i> = 133 | Low Deprivation (0.12–0.26), <i>n</i> = 128 |
|------------------------------------|--------------------------------|----------------------------------------------|-----------------------------------------------------|----------------------------------------------------|---------------------------------------------|
| Deprivation Index                  | 0.32 (0.26–0.42)               | 0.53 (0.48–0.65)                             | 0.37 (0.34–0.40)                                    | 0.29 (0.27–0.31)                                   | 0.22 (0.18–0.24)                            |
| Below poverty level, %             | 10.5 (5.5–22.1)                | 33.9 (27.7–43.3)                             | 15.0 (11.8–19.9)                                    | 7.2 (6.0–9.7)                                      | 3.8 (3.0–4.7)                               |
| Assisted income, %                 | 9.9 (4.4–20.2)                 | 31.2 (23.0–44.8)                             | 13.7 (10.7–17.2)                                    | 7.5 (5.2–9.7)                                      | 3.0 (1.9–4.3)                               |
| Less than high school education, % | 8.9 (5.6–14.6)                 | 21.7 (16.3–25.8)                             | 11.3 (8.5–13.6)                                     | 6.8 (6.8–9.1)                                      | 4.0 (1.6–5.9)                               |
| Median household income, \$        | 56 752 (40 521–73 660)         | 27 854 (22 854–37 431)                       | 48 750 (42 073–55 342)                              | 62 639 (58 463–66 537)                             | 87 466 (78 026–102 235)                     |
| No health insurance, %             | 8.9 (5.1–12.7)                 | 16.3 (12.7–21.5)                             | 10.7 (9.1–12.3)                                     | 7.0 (5.8–8.9)                                      | 3.4 (2.6–4.7)                               |
| Vacant housing, %                  | 8.2 (4.9–12.7)                 | 17.0 (12.3–28.5)                             | 8.5 (6.4–12.7)                                      | 7.4 (4.8–9.0)                                      | 4.5 (2.3–6.6)                               |

Data in table are presented as median (IQR).
